# Supplementary material for: Where does methanol lose hydrogen to trigger steam reforming? A revisit of methanol dehydrogenation on the PdZn alloy model obtained from kinetic Monte Carlo simulations
Source: Royal Society of Chemistry journal article supplement (doi:10.1039/c5cp05020k), 2015-12-22
Supplement: c5cp05020k1.pdf [file c5cp05020k1.pdf]

Supporting information

**Where does methanol lose hydrogen to trigger steam  
reforming? A revisit of methanol dehydrogenation on the  
PdZn alloy model obtained from kinetic Monte Carlo  
simulations**

Feng Cheng, Zhao-Xu Chen\*

*Institute of Theoretical and Computational Chemistry, Key Laboratory of Mesoscopic  
Chemistry of MOE, School of Chemistry and Chemical Engineering, Nanjing  
University, Nanjing, 210093, P.R. China*

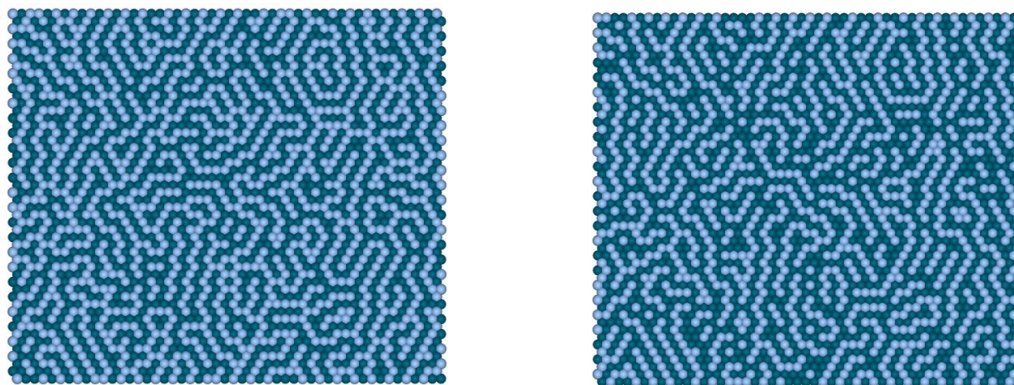

**Figure S1** Atomic arrangement of the low-temperature alloy obtained from kMC simulation for the first layer (left) and second layer (right). The blue and white spheres denote Pd and Zn respectively.

---

\* Corresponding author. Fax: +86 2583593353. E-mail address: zxchen@nju.edu.cn

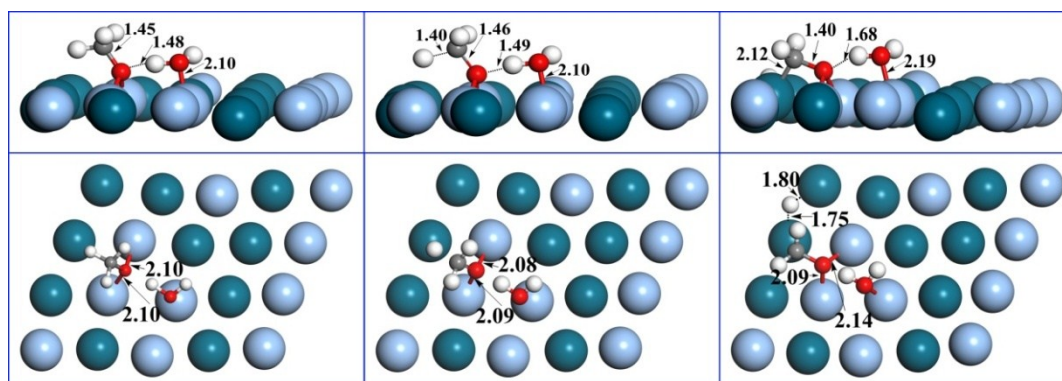

**Figure S2** Dehydrogenation of  $\text{CH}_3\text{O}^*$  with co-adsorbed water on the kMC-model

**Table S1** Reaction heats (in kJ/mol) and energy barriers (in eV) of methoxy dehydrogenation to formaldehyde\*.

| Reaction                                                    | kMC model                          |                | kMC model<br>(co-adsorbed with $\text{H}_2\text{O}$ ) |                | Ideal model                        |                |
|-------------------------------------------------------------|------------------------------------|----------------|-------------------------------------------------------|----------------|------------------------------------|----------------|
|                                                             | $\Delta\text{H}(\Delta\text{H}_0)$ | $E_a(E_{a,0})$ | $\Delta\text{H}(\Delta\text{H}_0)$                    | $E_a(E_{a,0})$ | $\Delta\text{H}(\Delta\text{H}_0)$ | $E_a(E_{a,0})$ |
| $\text{CH}_3\text{O} \rightarrow \text{CH}_2\text{O}$<br>+H | 90(75)                             | 1.29(1.17)     | 64(52)                                                | 0.87(0.73)     | 60(45)                             | 1.13(0.93)     |

\*: Values in parentheses are ZPE corrected.

Cartesian coordinates of the stationary points.

| $\text{CH}_3\text{OH}$ | IS:       |          |           | TS        |           |           | FS        |           |           |
|------------------------|-----------|----------|-----------|-----------|-----------|-----------|-----------|-----------|-----------|
| C                      | 0.409950  | 4.977250 | 10.673640 | 0.509960  | 4.908360  | 10.236590 | 0.858270  | 6.518640  | 9.613120  |
| H                      | -0.542350 | 5.499130 | 10.534200 | 1.084900  | 5.274310  | 11.096240 | -0.043550 | 6.013400  | 9.992620  |
| H                      | 1.109800  | 5.631460 | 11.209880 | -0.457290 | 5.433320  | 10.210880 | 0.890580  | 7.542960  | 10.008470 |
| H                      | 0.240000  | 4.054530 | 11.246470 | 0.327120  | 3.828940  | 10.333370 | 1.745920  | 5.970340  | 9.951500  |
| H                      | 1.769680  | 4.193680 | 9.411670  | 2.347900  | 4.856460  | 8.851920  | 3.142190  | 3.185850  | 7.875870  |
| O                      | 0.917010  | 4.669310 | 9.352430  | 1.212680  | 5.231490  | 8.999200  | 0.833670  | 6.541860  | 8.167820  |
| Pd                     | -0.904370 | 2.254340 | 6.648180  | -0.857600 | 2.240820  | 6.641650  | -0.870010 | 2.253220  | 6.623460  |
| Pd                     | -2.789680 | 7.083240 | 6.985990  | -2.806750 | 7.088690  | 6.993570  | -2.949020 | 7.058150  | 6.987170  |
| Pd                     | 1.778550  | 2.392340 | 6.797380  | 1.824690  | 2.413190  | 6.804490  | 1.773330  | 2.445460  | 6.928650  |
| Pd                     | -1.451280 | 9.995960 | 6.838330  | -1.465910 | 10.022280 | 6.839970  | -1.445780 | 10.076810 | 6.835780  |
| Pd                     | 4.476350  | 2.348960 | 6.927400  | 4.526930  | 2.364010  | 6.902870  | 4.513500  | 2.342410  | 6.956320  |
| Pd                     | 3.322280  | 4.836660 | 7.041310  | 3.385940  | 4.817700  | 7.188780  | 3.405290  | 4.833690  | 7.064700  |
| Pd                     | 1.331960  | 9.784740 | 6.976410  | 1.317710  | 9.784700  | 6.973650  | 1.341950  | 9.899950  | 6.969450  |
| Pd                     | 7.143270  | 2.406320 | 6.995320  | 7.193470  | 2.432440  | 6.972970  | 7.178020  | 2.475910  | 6.936050  |
| Pd                     | 5.022980  | 7.080020 | 6.840870  | 5.017860  | 7.072870  | 6.857650  | 4.943180  | 7.131980  | 6.838660  |
| Pd                     | 4.235360  | 9.845880 | 6.935980  | 4.224070  | 9.833640  | 6.930730  | 4.237700  | 9.888400  | 6.932800  |
| Pd                     | 1.381470  | 0.507030 | 4.782440  | 1.371310  | 0.520600  | 4.797240  | 1.374400  | 0.586090  | 4.814300  |
| Pd                     | -0.865660 | 5.466500 | 5.134590  | -0.778170 | 5.522070  | 5.065870  | -0.788980 | 5.567620  | 4.989830  |

|    |           |           |          |           |           |          |           |           |          |
|----|-----------|-----------|----------|-----------|-----------|----------|-----------|-----------|----------|
| Pd | -1.591540 | 8.081240  | 4.704960 | -1.613400 | 8.109420  | 4.708500 | -1.660770 | 8.153810  | 4.738390 |
| Pd | 4.158070  | 0.810080  | 4.681120 | 4.158240  | 0.791810  | 4.685230 | 4.169030  | 0.810720  | 4.673540 |
| Pd | 1.879960  | 5.517190  | 4.847420 | 1.989450  | 5.501190  | 4.915400 | 1.973650  | 5.581000  | 4.816120 |
| Pd | 1.193030  | 8.119340  | 4.695300 | 1.176160  | 8.077780  | 4.699880 | 1.099680  | 8.130090  | 4.785160 |
| Pd | 6.908930  | 0.794750  | 4.820360 | 6.907860  | 0.791270  | 4.824430 | 6.909440  | 0.790340  | 4.833600 |
| Pd | 2.684280  | 10.533440 | 4.734330 | 2.673660  | 10.515930 | 4.728200 | 2.682100  | 10.510200 | 4.717900 |
| Pd | 7.039050  | 5.514100  | 4.883380 | 7.111070  | 5.531510  | 4.863950 | 7.105000  | 5.546120  | 4.824780 |
| Pd | 6.414680  | 8.261500  | 4.833280 | 6.393950  | 8.257770  | 4.835250 | 6.354360  | 8.280160  | 4.820270 |
| Pd | 0.178910  | 1.635800  | 2.502840 | 0.178910  | 1.635800  | 2.502840 | 0.178910  | 1.635800  | 2.502840 |
| Pd | -0.891180 | 4.089570  | 2.502840 | -0.891180 | 4.089570  | 2.502840 | -0.891180 | 4.089570  | 2.502840 |
| Pd | -3.031350 | 8.997110  | 2.502840 | -3.031350 | 8.997110  | 2.502840 | -3.031350 | 8.997110  | 2.502840 |
| Pd | 1.785770  | 4.089570  | 2.502840 | 1.785770  | 4.089570  | 2.502840 | 1.785770  | 4.089570  | 2.502840 |
| Pd | -0.354400 | 8.997110  | 2.502840 | -0.354400 | 8.997110  | 2.502840 | -0.354400 | 8.997110  | 2.502840 |
| Pd | -1.424490 | 11.450880 | 2.502840 | -1.424490 | 11.450880 | 2.502840 | -1.424490 | 11.450880 | 2.502840 |
| Pd | 4.462720  | 4.089570  | 2.502840 | 4.462720  | 4.089570  | 2.502840 | 4.462720  | 4.089570  | 2.502840 |
| Pd | 3.392640  | 6.543340  | 2.502840 | 3.392640  | 6.543340  | 2.502840 | 3.392640  | 6.543340  | 2.502840 |
| Pd | 1.252460  | 11.450880 | 2.502840 | 1.252460  | 11.450880 | 2.502840 | 1.252460  | 11.450880 | 2.502840 |
| Pd | 8.209760  | 1.635800  | 2.502840 | 8.209760  | 1.635800  | 2.502840 | 8.209760  | 1.635800  | 2.502840 |
| Pd | 7.139670  | 4.089570  | 2.502840 | 7.139670  | 4.089570  | 2.502840 | 7.139670  | 4.089570  | 2.502840 |
| Pd | 4.999500  | 8.997110  | 2.502840 | 4.999500  | 8.997110  | 2.502840 | 4.999500  | 8.997110  | 2.502840 |
| Pd | 3.929410  | 11.450880 | 2.502840 | 3.929410  | 11.450880 | 2.502840 | 3.929410  | 11.450880 | 2.502840 |
| Pd | 0.000000  | 0.000000  | 0.000000 | 0.000000  | 0.000000  | 0.000000 | 0.000000  | 0.000000  | 0.000000 |
| Pd | -2.140170 | 4.907540  | 0.000000 | -2.140170 | 4.907540  | 0.000000 | -2.140170 | 4.907540  | 0.000000 |
| Pd | -3.210260 | 7.361300  | 0.000000 | -3.210260 | 7.361300  | 0.000000 | -3.210260 | 7.361300  | 0.000000 |
| Pd | -4.280350 | 9.815070  | 0.000000 | -4.280350 | 9.815070  | 0.000000 | -4.280350 | 9.815070  | 0.000000 |
| Pd | 2.676950  | 0.000000  | 0.000000 | 2.676950  | 0.000000  | 0.000000 | 2.676950  | 0.000000  | 0.000000 |
| Pd | 1.606860  | 2.453770  | 0.000000 | 1.606860  | 2.453770  | 0.000000 | 1.606860  | 2.453770  | 0.000000 |
| Pd | 0.536780  | 4.907540  | 0.000000 | 0.536780  | 4.907540  | 0.000000 | 0.536780  | 4.907540  | 0.000000 |
| Pd | -0.533310 | 7.361300  | 0.000000 | -0.533310 | 7.361300  | 0.000000 | -0.533310 | 7.361300  | 0.000000 |
| Pd | 5.353900  | 0.000000  | 0.000000 | 5.353900  | 0.000000  | 0.000000 | 5.353900  | 0.000000  | 0.000000 |
| Pd | 4.283810  | 2.453770  | 0.000000 | 4.283810  | 2.453770  | 0.000000 | 4.283810  | 2.453770  | 0.000000 |
| Pd | 2.143640  | 7.361300  | 0.000000 | 2.143640  | 7.361300  | 0.000000 | 2.143640  | 7.361300  | 0.000000 |
| Pd | 1.073550  | 9.815070  | 0.000000 | 1.073550  | 9.815070  | 0.000000 | 1.073550  | 9.815070  | 0.000000 |
| Pd | 8.030850  | 0.000000  | 0.000000 | 8.030850  | 0.000000  | 0.000000 | 8.030850  | 0.000000  | 0.000000 |
| Pd | 5.890680  | 4.907540  | 0.000000 | 5.890680  | 4.907540  | 0.000000 | 5.890680  | 4.907540  | 0.000000 |
| Pd | 4.820590  | 7.361300  | 0.000000 | 4.820590  | 7.361300  | 0.000000 | 4.820590  | 7.361300  | 0.000000 |
| Zn | -5.148410 | 12.152890 | 7.061100 | -5.140470 | 12.126950 | 7.067980 | -5.130200 | 12.173400 | 7.099940 |
| Zn | 8.514440  | 4.562270  | 7.124860 | 8.591070  | 4.583270  | 7.056580 | -2.086440 | 4.604740  | 7.018190 |
| Zn | -3.972340 | 9.417950  | 7.194350 | -3.981760 | 9.422280  | 7.194030 | -3.959450 | 9.474180  | 7.147690 |
| Zn | 2.911380  | 0.081110  | 6.945610 | 2.918350  | 0.105270  | 6.954420 | 2.909940  | 0.141750  | 6.958950 |
| Zn | 0.627170  | 4.679980  | 7.113650 | 0.619880  | 4.669240  | 7.088570 | 0.680770  | 4.749050  | 7.017160 |
| Zn | -0.248210 | 7.577700  | 6.853490 | -0.277210 | 7.610980  | 6.853160 | -0.423310 | 7.619350  | 6.931600 |
| Zn | 0.198090  | 12.207580 | 6.950250 | 0.203490  | 12.208050 | 6.949040 | 5.556950  | -0.029730 | 6.966370 |
| Zn | 2.471510  | 7.354330  | 6.939730 | 2.479000  | 7.363130  | 6.943030 | 2.419620  | 7.355910  | 6.968130 |
| Zn | 2.871210  | 12.118620 | 6.967320 | 2.874880  | 12.112450 | 6.960110 | 2.893550  | 12.156170 | 6.968120 |

|    |           |           |          |           |           |          |           |           |          |
|----|-----------|-----------|----------|-----------|-----------|----------|-----------|-----------|----------|
| Zn | 5.893510  | 4.680760  | 7.244330 | 5.972250  | 4.707770  | 7.258530 | 5.985860  | 4.773600  | 7.220610 |
| Zn | 0.462120  | 3.197900  | 4.609870 | 0.498650  | 3.212200  | 4.613820 | 0.482700  | 3.238360  | 4.620020 |
| Zn | -2.650870 | 10.502080 | 4.628110 | -2.665860 | 10.521640 | 4.628260 | -2.685030 | 10.563520 | 4.630110 |
| Zn | 3.125500  | 3.232620  | 4.741090 | 3.166700  | 3.220440  | 4.734310 | 3.109150  | 3.223040  | 4.778030 |
| Zn | 0.036200  | 10.554830 | 4.660370 | 0.030890  | 10.535280 | 4.658250 | 0.026650  | 10.571350 | 4.655580 |
| Zn | 5.787840  | 3.158640  | 4.735490 | 5.831070  | 3.174810  | 4.725880 | 5.803190  | 3.168730  | 4.717500 |
| Zn | 4.486960  | 5.603410  | 4.720610 | 4.560020  | 5.610550  | 4.714890 | 4.552800  | 5.598760  | 4.718260 |
| Zn | 3.811860  | 8.161370  | 4.710560 | 3.797940  | 8.142230  | 4.707080 | 3.733030  | 8.133360  | 4.712470 |
| Zn | 9.489450  | 0.684650  | 4.596140 | 9.483910  | 0.681240  | 4.594920 | 9.482700  | 0.696850  | 4.593170 |
| Zn | 8.416720  | 3.220880  | 4.626460 | 8.459300  | 3.231020  | 4.619670 | 8.447940  | 3.245610  | 4.613850 |
| Zn | 5.281560  | 10.546500 | 4.662920 | 5.273480  | 10.547530 | 4.661490 | 5.276650  | 10.576990 | 4.660560 |
| Zn | -1.961260 | 6.543340  | 2.502840 | -1.961260 | 6.543340  | 2.502840 | -1.961260 | 6.543340  | 2.502840 |
| Zn | -4.101440 | 11.450880 | 2.502840 | -4.101440 | 11.450880 | 2.502840 | -4.101440 | 11.450880 | 2.502840 |
| Zn | 2.855860  | 1.635800  | 2.502840 | 2.855860  | 1.635800  | 2.502840 | 2.855860  | 1.635800  | 2.502840 |
| Zn | 0.715690  | 6.543340  | 2.502840 | 0.715690  | 6.543340  | 2.502840 | 0.715690  | 6.543340  | 2.502840 |
| Zn | 5.532810  | 1.635800  | 2.502840 | 5.532810  | 1.635800  | 2.502840 | 5.532810  | 1.635800  | 2.502840 |
| Zn | 2.322550  | 8.997110  | 2.502840 | 2.322550  | 8.997110  | 2.502840 | 2.322550  | 8.997110  | 2.502840 |
| Zn | 6.069590  | 6.543340  | 2.502840 | 6.069590  | 6.543340  | 2.502840 | 6.069590  | 6.543340  | 2.502840 |
| Zn | -1.070090 | 2.453770  | 0.000000 | -1.070090 | 2.453770  | 0.000000 | -1.070090 | 2.453770  | 0.000000 |
| Zn | -1.603400 | 9.815070  | 0.000000 | -1.603400 | 9.815070  | 0.000000 | -1.603400 | 9.815070  | 0.000000 |
| Zn | 3.213730  | 4.907540  | 0.000000 | 3.213730  | 4.907540  | 0.000000 | 3.213730  | 4.907540  | 0.000000 |
| Zn | 6.960760  | 2.453770  | 0.000000 | 6.960760  | 2.453770  | 0.000000 | 6.960760  | 2.453770  | 0.000000 |
| Zn | 3.750500  | 9.815070  | 0.000000 | 3.750500  | 9.815070  | 0.000000 | 3.750500  | 9.815070  | 0.000000 |

| CH <sub>3</sub> O | IS:       |           |           | TS        |           |          | FS        |           |          |
|-------------------|-----------|-----------|-----------|-----------|-----------|----------|-----------|-----------|----------|
| C                 | 0.851270  | 6.524530  | 9.616480  | 2.489210  | 5.447320  | 9.229580 | 2.795760  | 5.487130  | 9.345500 |
| H                 | -0.048180 | 6.021640  | 9.995090  | 3.569830  | 4.702220  | 8.955900 | 2.507470  | 4.578460  | 9.892200 |
| H                 | 0.888410  | 7.548120  | 10.008120 | 1.960210  | 4.723870  | 9.856580 | 3.704060  | 6.002520  | 9.687620 |
| H                 | 1.742320  | 5.973770  | 9.956210  | 2.940840  | 6.249740  | 9.840280 | 3.136700  | 3.049190  | 7.925960 |
| O                 | 0.830920  | 6.543580  | 8.169320  | 1.568060  | 6.033290  | 8.313620 | 1.834390  | 6.196100  | 8.805740 |
| Pd                | -0.875110 | 2.263970  | 6.639220  | -0.853820 | 2.265350  | 6.641900 | -0.873010 | 2.233840  | 6.622600 |
| Pd                | -2.945940 | 7.055980  | 6.990430  | -2.843140 | 7.090780  | 6.999950 | -2.849630 | 7.102690  | 6.989250 |
| Pd                | 1.787250  | 2.445620  | 6.881470  | 1.815730  | 2.425110  | 6.819540 | 1.772790  | 2.389810  | 6.916100 |
| Pd                | -1.442990 | 10.077750 | 6.832650  | -1.482250 | 10.048350 | 6.841780 | -1.458580 | 10.036600 | 6.837520 |
| Pd                | 4.507510  | 2.350720  | 6.929280  | 4.527110  | 2.309730  | 6.907670 | 4.511730  | 2.361710  | 6.916530 |
| Pd                | 3.408360  | 4.818060  | 7.012380  | 3.518720  | 4.786960  | 7.144310 | 3.356870  | 4.802640  | 7.380950 |
| Pd                | 1.340180  | 9.905290  | 6.967180  | 1.295780  | 9.838650  | 6.949570 | 1.317920  | 9.812030  | 6.965710 |
| Pd                | 7.172650  | 2.480550  | 6.950630  | 7.194210  | 2.462010  | 6.935430 | 7.187230  | 2.449910  | 6.939140 |
| Pd                | 4.949450  | 7.132940  | 6.851080  | 5.008240  | 7.147640  | 6.846810 | 4.975910  | 7.067460  | 6.808330 |
| Pd                | 4.237110  | 9.886460  | 6.932150  | 4.204840  | 9.862010  | 6.936670 | 4.227520  | 9.843470  | 6.922370 |
| Pd                | 1.375610  | 0.571480  | 4.809960  | 1.375760  | 0.528500  | 4.794920 | 1.390730  | 0.563950  | 4.797100 |
| Pd                | -0.794620 | 5.561430  | 4.995300  | -0.757830 | 5.555790  | 5.010880 | -0.755460 | 5.547400  | 5.029400 |

|    |           |           |          |           |           |          |           |           |          |
|----|-----------|-----------|----------|-----------|-----------|----------|-----------|-----------|----------|
| Pd | -1.660290 | 8.146360  | 4.737140 | -1.634280 | 8.124800  | 4.698230 | -1.634480 | 8.127050  | 4.703250 |
| Pd | 4.161240  | 0.816650  | 4.680940 | 4.163030  | 0.796530  | 4.676930 | 4.191570  | 0.762940  | 4.679990 |
| Pd | 1.966130  | 5.577840  | 4.814990 | 2.022620  | 5.512010  | 4.901910 | 2.031900  | 5.481380  | 4.948150 |
| Pd | 1.100560  | 8.126820  | 4.782990 | 1.148040  | 8.066980  | 4.709630 | 1.163460  | 8.046000  | 4.727210 |
| Pd | 6.915450  | 0.790620  | 4.830320 | 6.916800  | 0.775250  | 4.825960 | 6.924670  | 0.778070  | 4.832080 |
| Pd | 2.682680  | 10.506760 | 4.715430 | 2.676240  | 10.492230 | 4.713050 | 2.675840  | 10.489980 | 4.718990 |
| Pd | 7.107570  | 5.546040  | 4.824580 | 7.130030  | 5.550130  | 4.843920 | 7.118570  | 5.536060  | 4.859120 |
| Pd | 6.350410  | 8.275170  | 4.824580 | 6.390270  | 8.279990  | 4.822390 | 6.380620  | 8.274540  | 4.819350 |
| Pd | 0.178910  | 1.635800  | 2.502840 | 0.178910  | 1.635800  | 2.502840 | 0.178910  | 1.635800  | 2.502840 |
| Pd | -0.891180 | 4.089570  | 2.502840 | -0.891180 | 4.089570  | 2.502840 | -0.891180 | 4.089570  | 2.502840 |
| Pd | -3.031350 | 8.997110  | 2.502840 | -3.031350 | 8.997110  | 2.502840 | -3.031350 | 8.997110  | 2.502840 |
| Pd | 1.785770  | 4.089570  | 2.502840 | 1.785770  | 4.089570  | 2.502840 | 1.785770  | 4.089570  | 2.502840 |
| Pd | -0.354400 | 8.997110  | 2.502840 | -0.354400 | 8.997110  | 2.502840 | -0.354400 | 8.997110  | 2.502840 |
| Pd | -1.424490 | 11.450880 | 2.502840 | -1.424490 | 11.450880 | 2.502840 | -1.424490 | 11.450880 | 2.502840 |
| Pd | 4.462720  | 4.089570  | 2.502840 | 4.462720  | 4.089570  | 2.502840 | 4.462720  | 4.089570  | 2.502840 |
| Pd | 3.392640  | 6.543340  | 2.502840 | 3.392630  | 6.543340  | 2.502840 | 3.392640  | 6.543340  | 2.502840 |
| Pd | 1.252460  | 11.450880 | 2.502840 | 1.252460  | 11.450880 | 2.502840 | 1.252460  | 11.450880 | 2.502840 |
| Pd | 8.209760  | 1.635800  | 2.502840 | 8.209760  | 1.635800  | 2.502840 | 8.209760  | 1.635800  | 2.502840 |
| Pd | 7.139670  | 4.089570  | 2.502840 | 7.139670  | 4.089570  | 2.502840 | 7.139670  | 4.089570  | 2.502840 |
| Pd | 4.999500  | 8.997110  | 2.502840 | 4.999500  | 8.997110  | 2.502840 | 4.999500  | 8.997110  | 2.502840 |
| Pd | 3.929410  | 11.450880 | 2.502840 | 3.929410  | 11.450880 | 2.502840 | 3.929410  | 11.450880 | 2.502840 |
| Pd | 0.000000  | 0.000000  | 0.000000 | 0.000000  | 0.000000  | 0.000000 | 0.000000  | 0.000000  | 0.000000 |
| Pd | -2.140170 | 4.907540  | 0.000000 | 8.567630  | 4.907540  | 0.000000 | -2.140170 | 4.907540  | 0.000000 |
| Pd | -3.210260 | 7.361300  | 0.000000 | 7.497540  | 7.361300  | 0.000000 | -3.210260 | 7.361300  | 0.000000 |
| Pd | -4.280350 | 9.815070  | 0.000000 | -4.280350 | 9.815070  | 0.000000 | -4.280350 | 9.815070  | 0.000000 |
| Pd | 2.676950  | 0.000000  | 0.000000 | 2.676950  | 0.000000  | 0.000000 | 2.676950  | 0.000000  | 0.000000 |
| Pd | 1.606860  | 2.453770  | 0.000000 | 1.606860  | 2.453770  | 0.000000 | 1.606860  | 2.453770  | 0.000000 |
| Pd | 0.536780  | 4.907540  | 0.000000 | 0.536780  | 4.907540  | 0.000000 | 0.536780  | 4.907540  | 0.000000 |
| Pd | -0.533310 | 7.361300  | 0.000000 | -0.533310 | 7.361300  | 0.000000 | -0.533310 | 7.361300  | 0.000000 |
| Pd | 5.353900  | 0.000000  | 0.000000 | 5.353900  | 0.000000  | 0.000000 | 5.353900  | 0.000000  | 0.000000 |
| Pd | 4.283810  | 2.453770  | 0.000000 | 4.283810  | 2.453770  | 0.000000 | 4.283810  | 2.453770  | 0.000000 |
| Pd | 2.143640  | 7.361300  | 0.000000 | 2.143640  | 7.361300  | 0.000000 | 2.143640  | 7.361300  | 0.000000 |
| Pd | 1.073550  | 9.815070  | 0.000000 | 1.073550  | 9.815070  | 0.000000 | 1.073550  | 9.815070  | 0.000000 |
| Pd | 8.030850  | 0.000000  | 0.000000 | 8.030850  | 0.000000  | 0.000000 | 8.030850  | 0.000000  | 0.000000 |
| Pd | 5.890680  | 4.907540  | 0.000000 | 5.890680  | 4.907540  | 0.000000 | 5.890680  | 4.907540  | 0.000000 |
| Pd | 4.820590  | 7.361300  | 0.000000 | 4.820590  | 7.361300  | 0.000000 | 4.820590  | 7.361300  | 0.000000 |
| Zn | -5.129120 | 12.172390 | 7.098980 | -5.148680 | 12.145480 | 7.067730 | -5.129580 | 12.141580 | 7.067860 |
| Zn | 8.623540  | 4.606160  | 7.028420 | 8.632120  | 4.605910  | 7.047740 | -2.101390 | 4.603120  | 7.047640 |
| Zn | -3.959670 | 9.471910  | 7.148190 | -3.993800 | 9.449670  | 7.169840 | -3.974230 | 9.463670  | 7.154950 |
| Zn | 2.909500  | 0.142440  | 6.961850 | 2.905190  | 0.119160  | 6.953160 | 2.922480  | 0.110430  | 6.952040 |
| Zn | 0.691650  | 4.746850  | 7.020270 | 0.622600  | 4.684670  | 7.031990 | 0.615070  | 4.656950  | 7.042710 |
| Zn | -0.426110 | 7.620590  | 6.933860 | -0.341150 | 7.669380  | 6.845130 | -0.322650 | 7.622680  | 6.841700 |
| Zn | 0.203330  | 12.250390 | 6.964430 | 0.199990  | 12.219010 | 6.952410 | 0.212980  | 12.219260 | 6.952020 |
| Zn | 2.418880  | 7.351290  | 6.968020 | 2.425520  | 7.405290  | 6.940650 | 2.426450  | 7.407210  | 7.063940 |
| Zn | 2.895470  | 12.159770 | 6.961640 | 2.876980  | 12.134520 | 6.955140 | 2.883440  | 12.117700 | 6.967880 |

|    |           |           |          |           |           |          |           |           |          |
|----|-----------|-----------|----------|-----------|-----------|----------|-----------|-----------|----------|
| Zn | 5.979960  | 4.774970  | 7.227470 | 6.042470  | 4.771380  | 7.193190 | 5.968220  | 4.721510  | 7.226270 |
| Zn | 0.484650  | 3.237340  | 4.620520 | 0.512060  | 3.222310  | 4.610800 | 0.498730  | 3.212910  | 4.609280 |
| Zn | -2.680700 | 10.556190 | 4.626770 | -2.671450 | 10.533500 | 4.624970 | -2.673670 | 10.543670 | 4.629760 |
| Zn | 3.120590  | 3.235400  | 4.776920 | 3.176070  | 3.227560  | 4.758640 | 3.133720  | 3.161590  | 4.754860 |
| Zn | 0.027350  | 10.575070 | 4.653570 | 0.025670  | 10.542620 | 4.650210 | 0.033070  | 10.511710 | 4.651040 |
| Zn | 5.806540  | 3.169560  | 4.724160 | 5.838970  | 3.168640  | 4.716140 | 5.825800  | 3.160600  | 4.710290 |
| Zn | 4.553380  | 5.600360  | 4.718700 | 4.572050  | 5.570950  | 4.750520 | 4.569050  | 5.566880  | 4.715500 |
| Zn | 3.734310  | 8.127430  | 4.712860 | 3.783450  | 8.109470  | 4.708330 | 3.772380  | 8.106830  | 4.721600 |
| Zn | 9.488280  | 0.698020  | 4.593920 | 9.490020  | 0.690140  | 4.596760 | 9.494570  | 0.684520  | 4.592300 |
| Zn | 8.447290  | 3.239910  | 4.615920 | 8.470320  | 3.242790  | 4.613450 | 8.461470  | 3.243390  | 4.616800 |
| Zn | 5.273410  | 10.575270 | 4.659530 | 5.264170  | 10.556840 | 4.662390 | 5.275010  | 10.561690 | 4.656490 |
| Zn | -1.961260 | 6.543340  | 2.502840 | -1.961270 | 6.543340  | 2.502840 | -1.961260 | 6.543340  | 2.502840 |
| Zn | -4.101440 | 11.450880 | 2.502840 | -4.101440 | 11.450880 | 2.502840 | -4.101440 | 11.450880 | 2.502840 |
| Zn | 2.855860  | 1.635800  | 2.502840 | 2.855860  | 1.635800  | 2.502840 | 2.855860  | 1.635800  | 2.502840 |
| Zn | 0.715690  | 6.543340  | 2.502840 | 0.715680  | 6.543340  | 2.502840 | 0.715690  | 6.543340  | 2.502840 |
| Zn | 5.532810  | 1.635800  | 2.502840 | 5.532810  | 1.635800  | 2.502840 | 5.532810  | 1.635800  | 2.502840 |
| Zn | 2.322550  | 8.997110  | 2.502840 | 2.322550  | 8.997110  | 2.502840 | 2.322550  | 8.997110  | 2.502840 |
| Zn | 6.069590  | 6.543340  | 2.502840 | 6.069580  | 6.543340  | 2.502840 | 6.069590  | 6.543340  | 2.502840 |
| Zn | -1.070090 | 2.453770  | 0.000000 | -1.070090 | 2.453770  | 0.000000 | -1.070090 | 2.453770  | 0.000000 |
| Zn | -1.603400 | 9.815070  | 0.000000 | -1.603400 | 9.815070  | 0.000000 | -1.603400 | 9.815070  | 0.000000 |
| Zn | 3.213730  | 4.907540  | 0.000000 | 3.213730  | 4.907540  | 0.000000 | 3.213730  | 4.907540  | 0.000000 |
| Zn | 6.960760  | 2.453770  | 0.000000 | 6.960760  | 2.453770  | 0.000000 | 6.960760  | 2.453770  | 0.000000 |
| Zn | 3.750500  | 9.815070  | 0.000000 | 3.750500  | 9.815070  | 0.000000 | 3.750500  | 9.815070  | 0.000000 |

CH<sub>2</sub>O

IS:

TS

FS

|    |           |           |          |           |           |          |           |           |           |
|----|-----------|-----------|----------|-----------|-----------|----------|-----------|-----------|-----------|
| C  | 2.434600  | 5.235820  | 9.238170 | 2.501710  | 4.368600  | 9.125280 | 2.867510  | 4.949930  | 9.405620  |
| H  | 2.691390  | 4.217890  | 9.587160 | 2.689750  | 3.345660  | 8.132420 | 3.789480  | 4.857480  | 10.021920 |
| H  | 3.003040  | 6.055000  | 9.707530 | 3.205080  | 4.225290  | 9.971890 | 3.131820  | 3.047410  | 7.911110  |
| O  | 1.189870  | 5.497300  | 8.910440 | 1.336670  | 4.712950  | 9.372820 | 1.758740  | 4.985060  | 9.871600  |
| Pd | -0.899950 | 2.273620  | 6.648370 | -0.899950 | 2.273620  | 6.648370 | -0.886320 | 2.240840  | 6.620820  |
| Pd | -2.805650 | 7.109650  | 6.996790 | -2.805650 | 7.109650  | 6.996790 | -2.833400 | 7.107790  | 6.980100  |
| Pd | 1.784040  | 2.404910  | 6.771950 | 1.784040  | 2.404910  | 6.771950 | 1.763000  | 2.408730  | 6.912590  |
| Pd | -1.476510 | 10.035890 | 6.834080 | -1.476510 | 10.035890 | 6.834080 | -1.471730 | 10.042310 | 6.843380  |
| Pd | 4.464930  | 2.458120  | 6.883970 | 4.464930  | 2.458120  | 6.883970 | 4.497030  | 2.401960  | 6.944150  |
| Pd | 3.286390  | 4.946180  | 7.285270 | 3.286390  | 4.946180  | 7.285270 | 3.222560  | 4.910670  | 7.455310  |
| Pd | 1.289770  | 9.872530  | 6.977860 | 1.289770  | 9.872530  | 6.977860 | 1.310420  | 9.812240  | 6.967170  |
| Pd | 7.141070  | 2.428790  | 6.963780 | 7.141070  | 2.428790  | 6.963780 | 7.167000  | 2.477890  | 6.951190  |
| Pd | 5.017660  | 7.103730  | 6.843570 | 5.017660  | 7.103730  | 6.843570 | 4.954040  | 7.095490  | 6.831190  |
| Pd | 4.210070  | 9.868240  | 6.937330 | 4.210070  | 9.868240  | 6.937330 | 4.216480  | 9.882300  | 6.939280  |
| Pd | 1.374260  | 0.505610  | 4.774520 | 1.374260  | 0.505610  | 4.774520 | 1.371670  | 0.567590  | 4.815020  |
| Pd | -0.767140 | 5.510950  | 5.161240 | -0.767140 | 5.510950  | 5.161240 | -0.799070 | 5.551120  | 4.979130  |
| Pd | -1.610900 | 8.086470  | 4.702540 | -1.610900 | 8.086470  | 4.702540 | -1.620540 | 8.151960  | 4.718150  |
| Pd | 4.156310  | 0.806860  | 4.692590 | 4.156310  | 0.806860  | 4.692590 | 4.172700  | 0.802070  | 4.681500  |
| Pd | 1.989570  | 5.508280  | 4.906880 | 1.989570  | 5.508280  | 4.906880 | 1.999230  | 5.499700  | 4.909100  |
| Pd | 1.168200  | 8.086310  | 4.706600 | 1.168200  | 8.086310  | 4.706600 | 1.164270  | 8.090160  | 4.698350  |

|    |           |           |          |           |           |          |           |           |          |
|----|-----------|-----------|----------|-----------|-----------|----------|-----------|-----------|----------|
| Pd | 6.909980  | 0.789850  | 4.812690 | 6.909980  | 0.789850  | 4.812690 | 6.907700  | 0.812420  | 4.828070 |
| Pd | 2.671990  | 10.513260 | 4.723570 | 2.671990  | 10.513260 | 4.723570 | 2.671400  | 10.532480 | 4.733050 |
| Pd | 7.118110  | 5.537260  | 4.871010 | 7.118110  | 5.537260  | 4.871010 | 7.085120  | 5.543000  | 4.861150 |
| Pd | 6.400630  | 8.259740  | 4.823980 | 6.400630  | 8.259740  | 4.823980 | 6.380760  | 8.274950  | 4.831460 |
| Pd | 0.178910  | 1.635800  | 2.502840 | 0.178910  | 1.635800  | 2.502840 | 0.178910  | 1.635800  | 2.502840 |
| Pd | -0.891180 | 4.089570  | 2.502840 | -0.891180 | 4.089570  | 2.502840 | -0.891180 | 4.089570  | 2.502840 |
| Pd | -3.031350 | 8.997110  | 2.502840 | -3.031350 | 8.997110  | 2.502840 | -3.031350 | 8.997110  | 2.502840 |
| Pd | 1.785770  | 4.089570  | 2.502840 | 1.785770  | 4.089570  | 2.502840 | 1.785770  | 4.089570  | 2.502840 |
| Pd | -0.354400 | 8.997110  | 2.502840 | -0.354400 | 8.997110  | 2.502840 | -0.354400 | 8.997110  | 2.502840 |
| Pd | -1.424490 | 11.450880 | 2.502840 | -1.424490 | 11.450880 | 2.502840 | -1.424490 | 11.450880 | 2.502840 |
| Pd | 4.462720  | 4.089570  | 2.502840 | 4.462720  | 4.089570  | 2.502840 | 4.462720  | 4.089570  | 2.502840 |
| Pd | 3.392640  | 6.543340  | 2.502840 | 3.392640  | 6.543340  | 2.502840 | 3.392640  | 6.543340  | 2.502840 |
| Pd | 1.252460  | 11.450880 | 2.502840 | 1.252460  | 11.450880 | 2.502840 | 1.252460  | 11.450880 | 2.502840 |
| Pd | 8.209760  | 1.635800  | 2.502840 | 8.209760  | 1.635800  | 2.502840 | 8.209760  | 1.635800  | 2.502840 |
| Pd | 7.139670  | 4.089570  | 2.502840 | 7.139670  | 4.089570  | 2.502840 | 7.139670  | 4.089570  | 2.502840 |
| Pd | 4.999500  | 8.997110  | 2.502840 | 4.999500  | 8.997110  | 2.502840 | 4.999500  | 8.997110  | 2.502840 |
| Pd | 3.929410  | 11.450880 | 2.502840 | 3.929410  | 11.450880 | 2.502840 | 3.929410  | 11.450880 | 2.502840 |
| Pd | 0.000000  | 0.000000  | 0.000000 | 0.000000  | 0.000000  | 0.000000 | 0.000000  | 0.000000  | 0.000000 |
| Pd | -2.140170 | 4.907540  | 0.000000 | -2.140170 | 4.907540  | 0.000000 | -2.140170 | 4.907540  | 0.000000 |
| Pd | -3.210260 | 7.361300  | 0.000000 | -3.210260 | 7.361300  | 0.000000 | -3.210260 | 7.361300  | 0.000000 |
| Pd | -4.280350 | 9.815070  | 0.000000 | -4.280350 | 9.815070  | 0.000000 | -4.280350 | 9.815070  | 0.000000 |
| Pd | 2.676950  | 0.000000  | 0.000000 | 2.676950  | 0.000000  | 0.000000 | 2.676950  | 0.000000  | 0.000000 |
| Pd | 1.606860  | 2.453770  | 0.000000 | 1.606860  | 2.453770  | 0.000000 | 1.606860  | 2.453770  | 0.000000 |
| Pd | 0.536780  | 4.907540  | 0.000000 | 0.536780  | 4.907540  | 0.000000 | 0.536780  | 4.907540  | 0.000000 |
| Pd | -0.533310 | 7.361300  | 0.000000 | -0.533310 | 7.361300  | 0.000000 | -0.533310 | 7.361300  | 0.000000 |
| Pd | 5.353900  | 0.000000  | 0.000000 | 5.353900  | 0.000000  | 0.000000 | 5.353900  | 0.000000  | 0.000000 |
| Pd | 4.283810  | 2.453770  | 0.000000 | 4.283810  | 2.453770  | 0.000000 | 4.283810  | 2.453770  | 0.000000 |
| Pd | 2.143640  | 7.361300  | 0.000000 | 2.143640  | 7.361300  | 0.000000 | 2.143640  | 7.361300  | 0.000000 |
| Pd | 1.073550  | 9.815070  | 0.000000 | 1.073550  | 9.815070  | 0.000000 | 1.073550  | 9.815070  | 0.000000 |
| Pd | 8.030850  | 0.000000  | 0.000000 | 8.030850  | 0.000000  | 0.000000 | 8.030850  | 0.000000  | 0.000000 |
| Pd | 5.890680  | 4.907540  | 0.000000 | 5.890680  | 4.907540  | 0.000000 | 5.890680  | 4.907540  | 0.000000 |
| Pd | 4.820590  | 7.361300  | 0.000000 | 4.820590  | 7.361300  | 0.000000 | 4.820590  | 7.361300  | 0.000000 |
| Zn | -5.160320 | 12.168420 | 7.056070 | -5.160320 | 12.168420 | 7.056070 | -5.146170 | 12.160740 | 7.106540 |
| Zn | -2.189270 | 4.588190  | 7.101990 | 8.518530  | 4.588190  | 7.101990 | -2.111530 | 4.614000  | 7.054240 |
| Zn | -3.995190 | 9.440250  | 7.171880 | -3.995190 | 9.440250  | 7.171880 | -3.992710 | 9.445920  | 7.186580 |
| Zn | 2.900320  | 0.112270  | 6.945810 | 2.900320  | 0.112270  | 6.945810 | 2.911660  | 0.120190  | 6.957180 |
| Zn | 0.549390  | 4.610510  | 7.198070 | 0.549390  | 4.610510  | 7.198070 | 0.573300  | 4.672700  | 6.988840 |
| Zn | -0.269850 | 7.639320  | 6.865150 | -0.269850 | 7.639320  | 6.865150 | -0.290770 | 7.610360  | 6.858620 |
| Zn | 5.526650  | 0.022700  | 6.953730 | 5.526650  | 0.022700  | 6.953730 | 0.197450  | 12.229070 | 6.950110 |
| Zn | 2.502290  | 7.522940  | 6.910520 | 2.502290  | 7.522940  | 6.910520 | 2.428120  | 7.404460  | 6.962900 |
| Zn | 2.858560  | 12.140740 | 6.965190 | 2.858560  | 12.140740 | 6.965190 | 2.858230  | 12.146810 | 6.978270 |
| Zn | 5.900310  | 4.718370  | 7.239640 | 5.900310  | 4.718370  | 7.239640 | 5.932550  | 4.758890  | 7.221230 |
| Zn | 0.489560  | 3.226650  | 4.614440 | 0.489560  | 3.226650  | 4.614440 | 0.481020  | 3.207330  | 4.604160 |
| Zn | -2.663020 | 10.508600 | 4.620850 | -2.663020 | 10.508600 | 4.620850 | -2.681830 | 10.555730 | 4.634060 |
| Zn | 3.150550  | 3.232790  | 4.713260 | 3.150550  | 3.232790  | 4.713260 | 3.115860  | 3.190430  | 4.772130 |

|    |           |           |          |           |           |          |           |           |          |
|----|-----------|-----------|----------|-----------|-----------|----------|-----------|-----------|----------|
| Zn | 0.026790  | 10.553020 | 4.659000 | 0.026790  | 10.553020 | 4.659000 | 0.025290  | 10.546150 | 4.659210 |
| Zn | 5.827090  | 3.180390  | 4.716720 | 5.827090  | 3.180390  | 4.716720 | 5.788000  | 3.187540  | 4.729900 |
| Zn | 4.559720  | 5.616190  | 4.717540 | 4.559720  | 5.616190  | 4.717540 | 4.544710  | 5.611060  | 4.707930 |
| Zn | 3.803560  | 8.143960  | 4.681300 | 3.803560  | 8.143960  | 4.681300 | 3.778940  | 8.159570  | 4.706840 |
| Zn | 9.485710  | 0.689140  | 4.600110 | 9.485710  | 0.689140  | 4.600110 | 9.479930  | 0.685970  | 4.593430 |
| Zn | 8.453320  | 3.242000  | 4.621130 | 8.453320  | 3.242000  | 4.621130 | 8.432450  | 3.247450  | 4.619640 |
| Zn | 5.267930  | 10.548220 | 4.662130 | 5.267930  | 10.548220 | 4.662130 | 5.275040  | 10.569650 | 4.669380 |
| Zn | -1.961260 | 6.543340  | 2.502840 | -1.961260 | 6.543340  | 2.502840 | -1.961260 | 6.543340  | 2.502840 |
| Zn | -4.101440 | 11.450880 | 2.502840 | -4.101440 | 11.450880 | 2.502840 | -4.101440 | 11.450880 | 2.502840 |
| Zn | 2.855860  | 1.635800  | 2.502840 | 2.855860  | 1.635800  | 2.502840 | 2.855860  | 1.635800  | 2.502840 |
| Zn | 0.715690  | 6.543340  | 2.502840 | 0.715690  | 6.543340  | 2.502840 | 0.715690  | 6.543340  | 2.502840 |
| Zn | 5.532810  | 1.635800  | 2.502840 | 5.532810  | 1.635800  | 2.502840 | 5.532810  | 1.635800  | 2.502840 |
| Zn | 2.322550  | 8.997110  | 2.502840 | 2.322550  | 8.997110  | 2.502840 | 2.322550  | 8.997110  | 2.502840 |
| Zn | 6.069590  | 6.543340  | 2.502840 | 6.069590  | 6.543340  | 2.502840 | 6.069590  | 6.543340  | 2.502840 |
| Zn | -1.070090 | 2.453770  | 0.000000 | -1.070090 | 2.453770  | 0.000000 | -1.070090 | 2.453770  | 0.000000 |
| Zn | -1.603400 | 9.815070  | 0.000000 | -1.603400 | 9.815070  | 0.000000 | -1.603400 | 9.815070  | 0.000000 |
| Zn | 3.213730  | 4.907540  | 0.000000 | 3.213730  | 4.907540  | 0.000000 | 3.213730  | 4.907540  | 0.000000 |
| Zn | 6.960760  | 2.453770  | 0.000000 | 6.960760  | 2.453770  | 0.000000 | 6.960760  | 2.453770  | 0.000000 |
| Zn | 3.750500  | 9.815070  | 0.000000 | 3.750500  | 9.815070  | 0.000000 | 3.750500  | 9.815070  | 0.000000 |

| CHO | IS:       |           |           | TS        |           |           | FS        |           |          |
|-----|-----------|-----------|-----------|-----------|-----------|-----------|-----------|-----------|----------|
| C   | 2.867510  | 4.949930  | 9.405620  | 3.107340  | 5.017310  | 9.436610  | 3.014740  | 3.196440  | 8.571110 |
| H   | 3.789480  | 4.857480  | 10.021920 | 4.030860  | 4.175900  | 9.220950  | 5.877840  | 2.423790  | 8.276960 |
| O   | 1.758740  | 4.985060  | 9.871600  | 2.686570  | 5.245610  | 10.539320 | 2.873300  | 3.220520  | 9.747770 |
| Pd  | -0.886320 | 2.240840  | 6.620820  | -0.877700 | 2.243320  | 6.643480  | -0.901060 | 2.237070  | 6.588440 |
| Pd  | -2.833400 | 7.107790  | 6.980100  | -2.831690 | 7.108220  | 6.986100  | -2.831490 | 7.093510  | 6.978210 |
| Pd  | 1.763000  | 2.408730  | 6.912590  | 1.794480  | 2.443920  | 6.808550  | 1.758090  | 2.408400  | 7.047410 |
| Pd  | -1.471730 | 10.042310 | 6.843380  | -1.477410 | 10.046780 | 6.841430  | -1.447170 | 10.028360 | 6.835030 |
| Pd  | 4.497030  | 2.401960  | 6.944150  | 4.491390  | 2.481070  | 6.883280  | 4.454860  | 2.350290  | 7.231590 |
| Pd  | 3.222560  | 4.910670  | 7.455310  | 3.175400  | 4.965030  | 7.511620  | 3.217340  | 4.870350  | 7.298930 |
| Pd  | 1.310420  | 9.812240  | 6.967170  | 1.296140  | 9.815780  | 6.957780  | 1.329710  | 9.804260  | 6.978000 |
| Pd  | 7.167000  | 2.477890  | 6.951190  | 7.172180  | 2.461960  | 6.955970  | 7.168180  | 2.417810  | 7.122180 |
| Pd  | 4.954040  | 7.095490  | 6.831190  | 4.979440  | 7.101720  | 6.836960  | 4.964320  | 7.063150  | 6.815370 |
| Pd  | 4.216480  | 9.882300  | 6.939280  | 4.199270  | 9.859360  | 6.928960  | 4.238920  | 9.845570  | 6.922180 |
| Pd  | 1.371670  | 0.567590  | 4.815020  | 1.377370  | 0.537410  | 4.798350  | 1.406300  | 0.625450  | 4.839380 |
| Pd  | -0.799070 | 5.551120  | 4.979130  | -0.751820 | 5.541870  | 4.993220  | -0.836610 | 5.550270  | 4.966830 |
| Pd  | -1.620540 | 8.151960  | 4.718150  | -1.616950 | 8.127700  | 4.717370  | -1.622360 | 8.155820  | 4.717330 |
| Pd  | 4.172700  | 0.802070  | 4.681500  | 4.169700  | 0.777600  | 4.702610  | 4.215230  | 0.860010  | 4.723170 |
| Pd  | 1.999230  | 5.499700  | 4.909100  | 2.051020  | 5.449630  | 4.968340  | 1.962710  | 5.522360  | 4.862870 |
| Pd  | 1.164270  | 8.090160  | 4.698350  | 1.168940  | 8.045080  | 4.692320  | 1.162120  | 8.114020  | 4.696710 |
| Pd  | 6.907700  | 0.812420  | 4.828070  | 6.914120  | 0.794640  | 4.820740  | 6.966020  | 0.846600  | 4.858940 |
| Pd  | 2.671400  | 10.532480 | 4.733050  | 2.665830  | 10.508820 | 4.721710  | 2.673150  | 10.543920 | 4.740090 |
| Pd  | 7.085120  | 5.543000  | 4.861150  | 7.145730  | 5.569630  | 4.825020  | 7.048790  | 5.508800  | 4.884230 |



|    |           |           |          |           |           |          |           |           |          |
|----|-----------|-----------|----------|-----------|-----------|----------|-----------|-----------|----------|
| Pd | 6.380760  | 8.274950  | 4.831460 | 6.383640  | 8.280630  | 4.834070 | 6.383450  | 8.270960  | 4.827130 |
| Pd | 0.178910  | 1.635800  | 2.502840 | 0.178910  | 1.635800  | 2.502840 | 0.178910  | 1.635800  | 2.502840 |
| Pd | -0.891180 | 4.089570  | 2.502840 | -0.891180 | 4.089570  | 2.502840 | -0.891180 | 4.089570  | 2.502840 |
| Pd | -3.031350 | 8.997110  | 2.502840 | -3.031350 | 8.997110  | 2.502840 | -3.031350 | 8.997110  | 2.502840 |
| Pd | 1.785770  | 4.089570  | 2.502840 | 1.785770  | 4.089570  | 2.502840 | 1.785770  | 4.089570  | 2.502840 |
| Pd | -0.354400 | 8.997110  | 2.502840 | -0.354400 | 8.997110  | 2.502840 | -0.354400 | 8.997110  | 2.502840 |
| Pd | -1.424490 | 11.450880 | 2.502840 | -1.424490 | 11.450880 | 2.502840 | -1.424490 | 11.450880 | 2.502840 |
| Pd | 4.462720  | 4.089570  | 2.502840 | 4.462720  | 4.089570  | 2.502840 | 4.462720  | 4.089570  | 2.502840 |
| Pd | 3.392640  | 6.543340  | 2.502840 | 3.392630  | 6.543340  | 2.502840 | 3.392640  | 6.543340  | 2.502840 |
| Pd | 1.252460  | 11.450880 | 2.502840 | 1.252460  | 11.450880 | 2.502840 | 1.252460  | 11.450880 | 2.502840 |
| Pd | 8.209760  | 1.635800  | 2.502840 | 8.209760  | 1.635800  | 2.502840 | 8.209760  | 1.635800  | 2.502840 |
| Pd | 7.139670  | 4.089570  | 2.502840 | 7.139670  | 4.089570  | 2.502840 | 7.139670  | 4.089570  | 2.502840 |
| Pd | 4.999500  | 8.997110  | 2.502840 | 4.999500  | 8.997110  | 2.502840 | 4.999500  | 8.997110  | 2.502840 |
| Pd | 3.929410  | 11.450880 | 2.502840 | 3.929410  | 11.450880 | 2.502840 | 3.929410  | 11.450880 | 2.502840 |
| Pd | 0.000000  | 0.000000  | 0.000000 | 0.000000  | 0.000000  | 0.000000 | 0.000000  | 0.000000  | 0.000000 |
| Pd | -2.140170 | 4.907540  | 0.000000 | 8.567630  | 4.907540  | 0.000000 | -2.140170 | 4.907540  | 0.000000 |
| Pd | -3.210260 | 7.361300  | 0.000000 | 7.497540  | 7.361300  | 0.000000 | -3.210260 | 7.361300  | 0.000000 |
| Pd | -4.280350 | 9.815070  | 0.000000 | -4.280350 | 9.815070  | 0.000000 | -4.280350 | 9.815070  | 0.000000 |
| Pd | 2.676950  | 0.000000  | 0.000000 | 2.676950  | 0.000000  | 0.000000 | 2.676950  | 0.000000  | 0.000000 |
| Pd | 1.606860  | 2.453770  | 0.000000 | 1.606860  | 2.453770  | 0.000000 | 1.606860  | 2.453770  | 0.000000 |
| Pd | 0.536780  | 4.907540  | 0.000000 | 0.536780  | 4.907540  | 0.000000 | 0.536780  | 4.907540  | 0.000000 |
| Pd | -0.533310 | 7.361300  | 0.000000 | -0.533310 | 7.361300  | 0.000000 | -0.533310 | 7.361300  | 0.000000 |
| Pd | 5.353900  | 0.000000  | 0.000000 | 5.353900  | 0.000000  | 0.000000 | 5.353900  | 0.000000  | 0.000000 |
| Pd | 4.283810  | 2.453770  | 0.000000 | 4.283810  | 2.453770  | 0.000000 | 4.283810  | 2.453770  | 0.000000 |
| Pd | 2.143640  | 7.361300  | 0.000000 | 2.143640  | 7.361300  | 0.000000 | 2.143640  | 7.361300  | 0.000000 |
| Pd | 1.073550  | 9.815070  | 0.000000 | 1.073550  | 9.815070  | 0.000000 | 1.073550  | 9.815070  | 0.000000 |
| Pd | 8.030850  | 0.000000  | 0.000000 | 8.030850  | 0.000000  | 0.000000 | 8.030850  | 0.000000  | 0.000000 |
| Pd | 5.890680  | 4.907540  | 0.000000 | 5.890680  | 4.907540  | 0.000000 | 5.890680  | 4.907540  | 0.000000 |
| Pd | 4.820590  | 7.361300  | 0.000000 | 4.820590  | 7.361300  | 0.000000 | 4.820590  | 7.361300  | 0.000000 |
| Zn | -5.146170 | 12.160740 | 7.106540 | -5.152730 | 12.137950 | 7.071750 | -5.138410 | 12.147670 | 7.105940 |
| Zn | 8.596270  | 4.614000  | 7.054240 | 8.613950  | 4.613810  | 7.049480 | -2.111200 | 4.593820  | 7.044330 |
| Zn | -3.992710 | 9.445920  | 7.186580 | -4.000990 | 9.455640  | 7.173860 | -3.966670 | 9.449590  | 7.166760 |
| Zn | 2.911660  | 0.120190  | 6.957180 | 2.904000  | 0.132020  | 6.950110 | 2.913870  | 0.085280  | 6.952110 |
| Zn | 0.573300  | 4.672700  | 6.988840 | 0.585950  | 4.673350  | 7.043880 | 0.576190  | 4.703290  | 6.958620 |
| Zn | -0.290770 | 7.610360  | 6.858620 | -0.291330 | 7.621670  | 6.866390 | -0.288450 | 7.596630  | 6.859110 |
| Zn | 0.197450  | 12.229070 | 6.950110 | 0.185020  | 12.267060 | 6.950140 | 0.217510  | 12.217230 | 6.978930 |
| Zn | 2.428120  | 7.404460  | 6.962900 | 2.431440  | 7.424790  | 6.957480 | 2.424470  | 7.378120  | 6.945220 |
| Zn | 2.858230  | 12.146810 | 6.978270 | 2.855350  | 12.138480 | 6.964070 | 2.889530  | 12.110780 | 7.013990 |
| Zn | 5.932550  | 4.758890  | 7.221230 | 5.967290  | 4.757930  | 7.122390 | 5.931590  | 4.733950  | 7.224070 |
| Zn | 0.481020  | 3.207330  | 4.604160 | 0.495390  | 3.204590  | 4.600860 | 0.484730  | 3.222060  | 4.602130 |
| Zn | -2.681830 | 10.555730 | 4.634060 | -2.671970 | 10.530330 | 4.628240 | -2.679510 | 10.565130 | 4.633900 |
| Zn | 3.115860  | 3.190430  | 4.772130 | 3.164660  | 3.187050  | 4.715000 | 3.099790  | 3.193890  | 4.838130 |
| Zn | 0.025290  | 10.546150 | 4.659210 | 0.031350  | 10.525030 | 4.657630 | 0.026470  | 10.566540 | 4.661700 |
| Zn | 5.788000  | 3.187540  | 4.729900 | 5.836800  | 3.184200  | 4.713180 | 5.760590  | 3.156910  | 4.788670 |
| Zn | 4.544710  | 5.611060  | 4.707930 | 4.582730  | 5.598810  | 4.713730 | 4.510170  | 5.576870  | 4.728210 |

|    |           |           |          |           |           |          |           |           |          |
|----|-----------|-----------|----------|-----------|-----------|----------|-----------|-----------|----------|
| Zn | 3.778940  | 8.159570  | 4.706840 | 3.780640  | 8.131010  | 4.702380 | 3.779380  | 8.158610  | 4.704620 |
| Zn | 9.479930  | 0.685970  | 4.593430 | 9.486770  | 0.687410  | 4.599620 | 9.515560  | 0.672570  | 4.579560 |
| Zn | 8.432450  | 3.247450  | 4.619640 | 8.464730  | 3.243880  | 4.619900 | 8.419050  | 3.244900  | 4.612880 |
| Zn | 5.275040  | 10.569650 | 4.669380 | 5.261180  | 10.561610 | 4.660550 | 5.289950  | 10.574200 | 4.663570 |
| Zn | -1.961260 | 6.543340  | 2.502840 | -1.961270 | 6.543340  | 2.502840 | -1.961260 | 6.543340  | 2.502840 |
| Zn | -4.101440 | 11.450880 | 2.502840 | -4.101440 | 11.450880 | 2.502840 | -4.101440 | 11.450880 | 2.502840 |
| Zn | 2.855860  | 1.635800  | 2.502840 | 2.855860  | 1.635800  | 2.502840 | 2.855860  | 1.635800  | 2.502840 |
| Zn | 0.715690  | 6.543340  | 2.502840 | 0.715680  | 6.543340  | 2.502840 | 0.715690  | 6.543340  | 2.502840 |
| Zn | 5.532810  | 1.635800  | 2.502840 | 5.532810  | 1.635800  | 2.502840 | 5.532810  | 1.635800  | 2.502840 |
| Zn | 2.322550  | 8.997110  | 2.502840 | 2.322550  | 8.997110  | 2.502840 | 2.322550  | 8.997110  | 2.502840 |
| Zn | 6.069590  | 6.543340  | 2.502840 | 6.069580  | 6.543340  | 2.502840 | 6.069590  | 6.543340  | 2.502840 |
| Zn | -1.070090 | 2.453770  | 0.000000 | -1.070090 | 2.453770  | 0.000000 | -1.070090 | 2.453770  | 0.000000 |
| Zn | -1.603400 | 9.815070  | 0.000000 | -1.603400 | 9.815070  | 0.000000 | -1.603400 | 9.815070  | 0.000000 |
| Zn | 3.213730  | 4.907540  | 0.000000 | 3.213730  | 4.907540  | 0.000000 | 3.213730  | 4.907540  | 0.000000 |
| Zn | 6.960760  | 2.453770  | 0.000000 | 6.960760  | 2.453770  | 0.000000 | 6.960760  | 2.453770  | 0.000000 |
| Zn | 3.750500  | 9.815070  | 0.000000 | 3.750500  | 9.815070  | 0.000000 | 3.750500  | 9.815070  | 0.000000 |

|    | CH <sub>3</sub> O_H <sub>2</sub> O |           |           | IS:       |           |           | TS        |           |          | FS |  |  |
|----|------------------------------------|-----------|-----------|-----------|-----------|-----------|-----------|-----------|----------|----|--|--|
| C  | 1.169340                           | 8.151730  | 10.342410 | 1.091330  | 8.075240  | 9.767600  | 1.038920  | 8.988260  | 8.952210 |    |  |  |
| H  | 1.272190                           | 9.203140  | 10.159940 | 1.199820  | 9.388850  | 9.295730  | 1.894710  | 9.119160  | 9.625720 |    |  |  |
| H  | 2.022660                           | 7.788770  | 10.935650 | 1.967120  | 7.750600  | 10.348500 | 0.094290  | 9.338780  | 9.385510 |    |  |  |
| H  | 0.286250                           | 7.964920  | 10.981250 | 0.183110  | 7.893360  | 10.360730 | 0.892180  | 6.172870  | 9.180350 |    |  |  |
| H  | 0.923530                           | 5.945930  | 9.520910  | 0.920370  | 5.902070  | 8.998560  | 1.644440  | 4.812270  | 9.499380 |    |  |  |
| H  | 1.836940                           | 4.439320  | 9.053910  | 1.547420  | 4.445820  | 9.413490  | 2.978400  | 10.510270 | 7.938380 |    |  |  |
| O  | 0.900710                           | 4.777080  | 8.945740  | 0.727350  | 4.880920  | 9.101950  | 0.955000  | 7.680340  | 8.452880 |    |  |  |
| O  | 1.066750                           | 6.717560  | 8.433810  | 1.023360  | 7.310590  | 8.541460  | 0.783880  | 5.173020  | 9.200440 |    |  |  |
| Pd | -0.902660                          | 2.233040  | 6.630960  | -0.878390 | 2.230280  | 6.626820  | -0.867220 | 2.296910  | 6.644670 |    |  |  |
| Pd | -2.848760                          | 7.080930  | 6.986850  | -2.882200 | 7.040290  | 6.998650  | -2.955580 | 7.036940  | 7.008240 |    |  |  |
| Pd | 1.780950                           | 2.412560  | 6.839290  | 1.827900  | 2.336970  | 6.757880  | 1.821470  | 2.363130  | 6.793190 |    |  |  |
| Pd | -1.467030                          | 10.043810 | 6.846890  | -1.418030 | 10.042860 | 6.820940  | -1.282830 | 10.082000 | 6.783800 |    |  |  |
| Pd | 4.499220                           | 2.372840  | 6.914660  | 4.507480  | 2.409920  | 6.908730  | 4.515780  | 2.387080  | 6.919090 |    |  |  |
| Pd | 3.387950                           | 4.838090  | 7.006380  | 3.360830  | 4.856750  | 6.983960  | 3.355160  | 4.817180  | 6.994070 |    |  |  |
| Pd | 1.312850                           | 9.905640  | 6.954130  | 1.360120  | 10.046500 | 6.963500  | 1.474540  | 10.048640 | 7.165380 |    |  |  |
| Pd | 7.162060                           | 2.513820  | 6.959640  | 7.171030  | 2.442620  | 6.968020  | 7.171510  | 2.469480  | 6.973410 |    |  |  |
| Pd | 5.008040                           | 7.132460  | 6.850350  | 4.991650  | 7.115820  | 6.857030  | 4.944620  | 7.112890  | 6.852580 |    |  |  |
| Pd | 4.214120                           | 9.888250  | 6.947740  | 4.248520  | 9.878030  | 6.927290  | 4.361730  | 9.916990  | 6.959390 |    |  |  |
| Pd | 1.358590                           | 0.541370  | 4.809850  | 1.380330  | 0.487500  | 4.762780  | 1.430850  | 0.526680  | 4.747020 |    |  |  |
| Pd | -0.838510                          | 5.549910  | 5.000090  | -0.809300 | 5.527920  | 5.166380  | -0.808660 | 5.502230  | 5.151760 |    |  |  |
| Pd | -1.614280                          | 8.154380  | 4.731830  | -1.632070 | 8.095630  | 4.736890  | -1.677580 | 8.084260  | 4.729590 |    |  |  |
| Pd | 4.142760                           | 0.817570  | 4.686160  | 4.148370  | 0.845930  | 4.685200  | 4.190720  | 0.860650  | 4.676000 |    |  |  |
| Pd | 1.924590                           | 5.563940  | 4.827060  | 1.921110  | 5.615190  | 4.824300  | 1.923720  | 5.638870  | 4.813960 |    |  |  |
| Pd | 1.154060                           | 8.129020  | 4.752500  | 1.110750  | 8.180570  | 4.833090  | 1.077260  | 8.223820  | 4.836910 |    |  |  |
| Pd | 6.896220                           | 0.814800  | 4.834740  | 6.911340  | 0.788620  | 4.820600  | 6.947390  | 0.789310  | 4.833770 |    |  |  |
| Pd | 2.678400                           | 10.539900 | 4.727480  | 2.702330  | 10.517170 | 4.706770  | 2.699850  | 10.515910 | 4.738350 |    |  |  |
| Pd | 7.058540                           | 5.531600  | 4.869230  | 7.103620  | 5.521030  | 4.844340  | 7.097500  | 5.553770  | 4.822660 |    |  |  |

|    |           |           |          |           |           |          |           |           |          |
|----|-----------|-----------|----------|-----------|-----------|----------|-----------|-----------|----------|
| Pd | 6.393550  | 8.283200  | 4.830860 | 6.369280  | 8.229860  | 4.813480 | 6.329010  | 8.291580  | 4.859060 |
| Pd | 0.178910  | 1.635800  | 2.502840 | 0.178910  | 1.635800  | 2.502840 | 0.178910  | 1.635800  | 2.502840 |
| Pd | -0.891180 | 4.089570  | 2.502840 | -0.891180 | 4.089570  | 2.502840 | -0.891180 | 4.089570  | 2.502840 |
| Pd | -3.031350 | 8.997110  | 2.502840 | -3.031350 | 8.997110  | 2.502840 | -3.031350 | 8.997110  | 2.502840 |
| Pd | 1.785770  | 4.089570  | 2.502840 | 1.785770  | 4.089570  | 2.502840 | 1.785770  | 4.089570  | 2.502840 |
| Pd | -0.354400 | 8.997110  | 2.502840 | -0.354400 | 8.997110  | 2.502840 | -0.354400 | 8.997110  | 2.502840 |
| Pd | -1.424490 | 11.450880 | 2.502840 | -1.424490 | 11.450880 | 2.502840 | -1.424490 | 11.450880 | 2.502840 |
| Pd | 4.462720  | 4.089570  | 2.502840 | 4.462720  | 4.089570  | 2.502840 | 4.462720  | 4.089570  | 2.502840 |
| Pd | 3.392640  | 6.543340  | 2.502840 | 3.392640  | 6.543340  | 2.502840 | 3.392640  | 6.543340  | 2.502840 |
| Pd | 1.252460  | 11.450880 | 2.502840 | 1.252460  | 11.450880 | 2.502840 | 1.252460  | 11.450880 | 2.502840 |
| Pd | 8.209760  | 1.635800  | 2.502840 | 8.209760  | 1.635800  | 2.502840 | 8.209760  | 1.635800  | 2.502840 |
| Pd | 7.139670  | 4.089570  | 2.502840 | 7.139670  | 4.089570  | 2.502840 | 7.139670  | 4.089570  | 2.502840 |
| Pd | 4.999500  | 8.997110  | 2.502840 | 4.999500  | 8.997110  | 2.502840 | 4.999500  | 8.997110  | 2.502840 |
| Pd | 3.929410  | 11.450880 | 2.502840 | 3.929410  | 11.450880 | 2.502840 | 3.929410  | 11.450880 | 2.502840 |
| Pd | 0.000000  | 0.000000  | 0.000000 | 0.000000  | 0.000000  | 0.000000 | 0.000000  | 0.000000  | 0.000000 |
| Pd | -2.140170 | 4.907540  | 0.000000 | -2.140170 | 4.907540  | 0.000000 | -2.140170 | 4.907540  | 0.000000 |
| Pd | -3.210260 | 7.361300  | 0.000000 | -3.210260 | 7.361300  | 0.000000 | -3.210260 | 7.361300  | 0.000000 |
| Pd | -4.280350 | 9.815070  | 0.000000 | -4.280350 | 9.815070  | 0.000000 | -4.280350 | 9.815070  | 0.000000 |
| Pd | 2.676950  | 0.000000  | 0.000000 | 2.676950  | 0.000000  | 0.000000 | 2.676950  | 0.000000  | 0.000000 |
| Pd | 1.606860  | 2.453770  | 0.000000 | 1.606860  | 2.453770  | 0.000000 | 1.606860  | 2.453770  | 0.000000 |
| Pd | 0.536780  | 4.907540  | 0.000000 | 0.536780  | 4.907540  | 0.000000 | 0.536780  | 4.907540  | 0.000000 |
| Pd | -0.533310 | 7.361300  | 0.000000 | -0.533310 | 7.361300  | 0.000000 | -0.533310 | 7.361300  | 0.000000 |
| Pd | 5.353900  | 0.000000  | 0.000000 | 5.353900  | 0.000000  | 0.000000 | 5.353900  | 0.000000  | 0.000000 |
| Pd | 4.283810  | 2.453770  | 0.000000 | 4.283810  | 2.453770  | 0.000000 | 4.283810  | 2.453770  | 0.000000 |
| Pd | 2.143640  | 7.361300  | 0.000000 | 2.143640  | 7.361300  | 0.000000 | 2.143640  | 7.361300  | 0.000000 |
| Pd | 1.073550  | 9.815070  | 0.000000 | 1.073550  | 9.815070  | 0.000000 | 1.073550  | 9.815070  | 0.000000 |
| Pd | 8.030850  | 0.000000  | 0.000000 | 8.030850  | 0.000000  | 0.000000 | 8.030850  | 0.000000  | 0.000000 |
| Pd | 5.890680  | 4.907540  | 0.000000 | 5.890680  | 4.907540  | 0.000000 | 5.890680  | 4.907540  | 0.000000 |
| Pd | 4.820590  | 7.361300  | 0.000000 | 4.820590  | 7.361300  | 0.000000 | 4.820590  | 7.361300  | 0.000000 |
| Zn | -5.150530 | 12.166020 | 7.105800 | -5.104290 | 12.151880 | 7.069960 | -5.032440 | 12.233940 | 7.078040 |
| Zn | 8.583690  | 4.612150  | 7.081350 | 8.567750  | 4.563620  | 7.121360 | 8.575150  | 4.593220  | 7.134850 |
| Zn | -3.987620 | 9.447080  | 7.185560 | -3.944410 | 9.436400  | 7.141270 | -3.823880 | 9.518770  | 7.125240 |
| Zn | 2.900160  | 0.120040  | 6.958010 | 2.927410  | 0.074100  | 6.951740 | 2.969320  | 0.093000  | 6.941100 |
| Zn | 0.654610  | 4.699760  | 6.912070 | 0.663460  | 4.551650  | 7.024230 | 0.682100  | 4.614050  | 7.089160 |
| Zn | -0.301650 | 7.575910  | 6.948360 | -0.355390 | 7.613150  | 6.985030 | -0.435010 | 7.525630  | 6.902650 |
| Zn | 0.173480  | 12.255410 | 6.953430 | 5.545440  | 0.055090  | 6.982620 | 5.607070  | 0.051150  | 7.005730 |
| Zn | 2.458180  | 7.387580  | 7.008790 | 2.475200  | 7.457530  | 7.032440 | 2.419820  | 7.298580  | 6.940350 |
| Zn | 2.857450  | 12.162860 | 6.970070 | 2.925030  | 12.188930 | 6.970780 | 8.357220  | 0.020900  | 6.955950 |
| Zn | 5.952280  | 4.761210  | 7.233420 | 5.941080  | 4.736750  | 7.236960 | 5.942560  | 4.756900  | 7.237160 |
| Zn | 0.463130  | 3.204070  | 4.604000 | 0.478300  | 3.224690  | 4.600330 | 0.491110  | 3.234660  | 4.605730 |
| Zn | -2.676090 | 10.545860 | 4.629210 | -2.657650 | 10.497580 | 4.618660 | -2.639430 | 10.503370 | 4.624370 |
| Zn | 3.112430  | 3.248960  | 4.760770 | 3.133690  | 3.289790  | 4.722160 | 3.126330  | 3.285480  | 4.727880 |
| Zn | 0.021940  | 10.569510 | 4.659660 | 0.034470  | 10.620010 | 4.655330 | 0.064810  | 10.650610 | 4.635530 |
| Zn | 5.785390  | 3.182870  | 4.722710 | 5.815480  | 3.169790  | 4.721160 | 5.816740  | 3.179310  | 4.726210 |
| Zn | 4.504440  | 5.611680  | 4.738780 | 4.544930  | 5.620880  | 4.711840 | 4.541060  | 5.616370  | 4.710100 |

|    |           |           |          |           |           |          |           |           |          |
|----|-----------|-----------|----------|-----------|-----------|----------|-----------|-----------|----------|
| Zn | 3.778870  | 8.167450  | 4.720170 | 3.736820  | 8.126950  | 4.722740 | 3.714810  | 8.132200  | 4.713110 |
| Zn | 9.471770  | 0.693690  | 4.591560 | 9.492300  | 0.677890  | 4.582930 | 9.522940  | 0.705800  | 4.585750 |
| Zn | 8.423780  | 3.245430  | 4.625420 | 8.452590  | 3.236390  | 4.622600 | 8.450340  | 3.252100  | 4.617990 |
| Zn | 5.270200  | 10.566850 | 4.667680 | 5.286350  | 10.532150 | 4.650910 | 5.292170  | 10.582530 | 4.636600 |
| Zn | -1.961260 | 6.543340  | 2.502840 | -1.961260 | 6.543340  | 2.502840 | -1.961260 | 6.543340  | 2.502840 |
| Zn | -4.101440 | 11.450880 | 2.502840 | -4.101440 | 11.450880 | 2.502840 | -4.101440 | 11.450880 | 2.502840 |
| Zn | 2.855860  | 1.635800  | 2.502840 | 2.855860  | 1.635800  | 2.502840 | 2.855860  | 1.635800  | 2.502840 |
| Zn | 0.715690  | 6.543340  | 2.502840 | 0.715690  | 6.543340  | 2.502840 | 0.715690  | 6.543340  | 2.502840 |
| Zn | 5.532810  | 1.635800  | 2.502840 | 5.532810  | 1.635800  | 2.502840 | 5.532810  | 1.635800  | 2.502840 |
| Zn | 2.322550  | 8.997110  | 2.502840 | 2.322550  | 8.997110  | 2.502840 | 2.322550  | 8.997110  | 2.502840 |
| Zn | 6.069590  | 6.543340  | 2.502840 | 6.069590  | 6.543340  | 2.502840 | 6.069590  | 6.543340  | 2.502840 |
| Zn | -1.070090 | 2.453770  | 0.000000 | -1.070090 | 2.453770  | 0.000000 | -1.070090 | 2.453770  | 0.000000 |
| Zn | -1.603400 | 9.815070  | 0.000000 | -1.603400 | 9.815070  | 0.000000 | -1.603400 | 9.815070  | 0.000000 |
| Zn | 3.213730  | 4.907540  | 0.000000 | 3.213730  | 4.907540  | 0.000000 | 3.213730  | 4.907540  | 0.000000 |
| Zn | 6.960760  | 2.453770  | 0.000000 | 6.960760  | 2.453770  | 0.000000 | 6.960760  | 2.453770  | 0.000000 |
| Zn | 3.750500  | 9.815070  | 0.000000 | 3.750500  | 9.815070  | 0.000000 | 3.750500  | 9.815070  | 0.000000 |
